# Supplementary material
Source: Springer Nature journal article supplement (https://www.springermedizin.de/resource/supplementary/12889_2011_3758_MOESM2_ESM.pdf/9491172)
Supplement: MOESM2 [file 9491172]

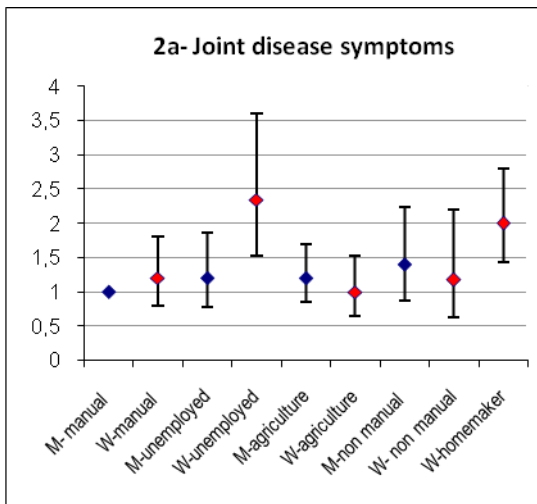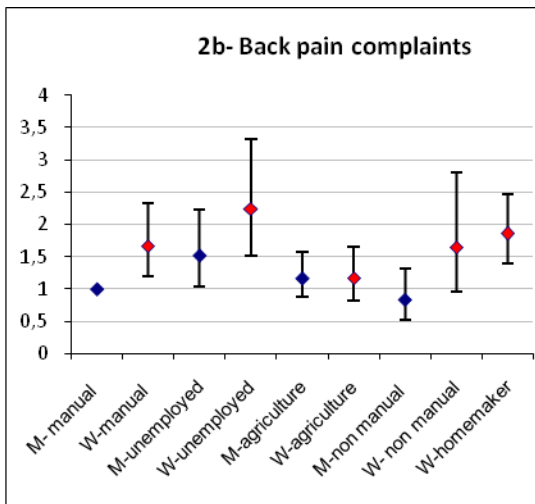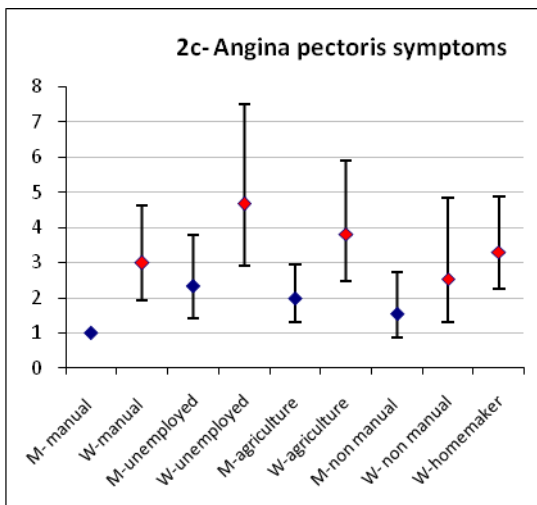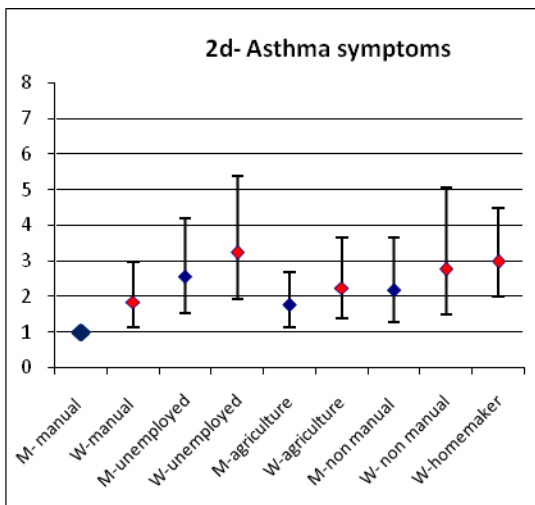

Note: Prevalence ratios are adjusted for age, setting, marital status, education and annual household income.
